# Supplementary material for: Ovalbumin-coated Fe3O4nanoparticles as a nanocarrier for chlorogenic acid to promote the anticancer efficacy on MDA-MB-231 cells
Source: Royal Society of Chemistry journal article supplement (doi:10.1039/d2nj00716a), 2022-01-01
Supplement: d2nj00716a1.pdf [file d2nj00716a1.pdf]

## Supporting information

### **Ovalbumin coated Fe<sub>3</sub>O<sub>4</sub> nanoparticles as a nanocarrier for chlorogenic acid to promote the anticancer efficacy on MDA-MB-231 cells**

Perumal Manivel<sup>a</sup>, Manickam Paulpandi<sup>b</sup>, Xiumin Chen<sup>acd\*</sup>

<sup>a</sup>School of Food and Biological Engineering, Jiangsu University, 301 Xuefu Road, Jingkou District, Zhenjiang, Jiangsu 212013, P.R. China.

<sup>b</sup> Disease Proteomics Laboratory, Department of Zoology, Bharathiar University, Coimbatore-641046, TN, India.

<sup>c</sup>Institute of Food Physical Processing, Jiangsu University, 301 Xuefu Road, Jingkou District, Zhenjiang, Jiangsu 212013, P.R. China.

<sup>d</sup>International Joint Research Laboratory of Intelligent Agriculture and Agri-products Processing, Jiangsu University, Zhenjiang 212013, China.

\* Corresponding author:  
Xiumin Chen, PhD, professor

\*Email: xmchen@ujs.edu.cn

Phone: 86-15751272839

### Emission spectral studies of OVA with C-Fe<sub>3</sub>O<sub>4</sub> NPs

The impact of the inner filter's effect (IFE) was regularized by the equation (Eqn. 1).

$$F_{corr} = F_{obs} \times e^{\frac{(A_{exc} + A_{emi})}{2}} \quad (1)$$

The Stern-Volmer equation (Eqn. 2) was then utilized to examine the quenching data.

$$\frac{F_0}{F} = 1 + K_{SV}[Q] \text{ (or) } \frac{F_0}{F} = 1 + k_q\tau_0[Q] \quad (2)$$

Where Stern-Volmer constant is denoted as  $K_{SV}$ ,  $k_q$  is the bimolecular quenching constant,  $F_0$  and  $F$  reflects the corrected fluorescence intensities of OVA free and C-Fe<sub>3</sub>O<sub>4</sub> NPs-bound forms, respectively.  $\tau_0$  is the average fluorescence lifetime of the Trp fluorophores of the native OVA and the quencher concentration is denoted by  $[Q]$ .

The emission spectra at different temperatures (298, 303, 308, and 313 K) were also used to estimate the binding constant ( $K_b$ ), number of binding sites ( $n$ ) and mode of binding involved in the interaction of C-Fe<sub>3</sub>O<sub>4</sub> NPs with OVA using equation (Eqn. 3).

$$\log \left[ \frac{F_0 - F}{F} \right] = \log K_b + n \log [Q] \quad (3)$$

Where,  $[Q]$ ,  $F$  and  $F_0$  represent the same parameters as that in equation 2.

$$\ln K_a = -\frac{\Delta H^\circ}{TR} + \frac{\Delta S^\circ}{R} \quad (4)$$

Where,  $K_a$  denotes the binding affinity constant,  $R$  represents gas constant and  $T(K)$  corresponds to absolute temperature.

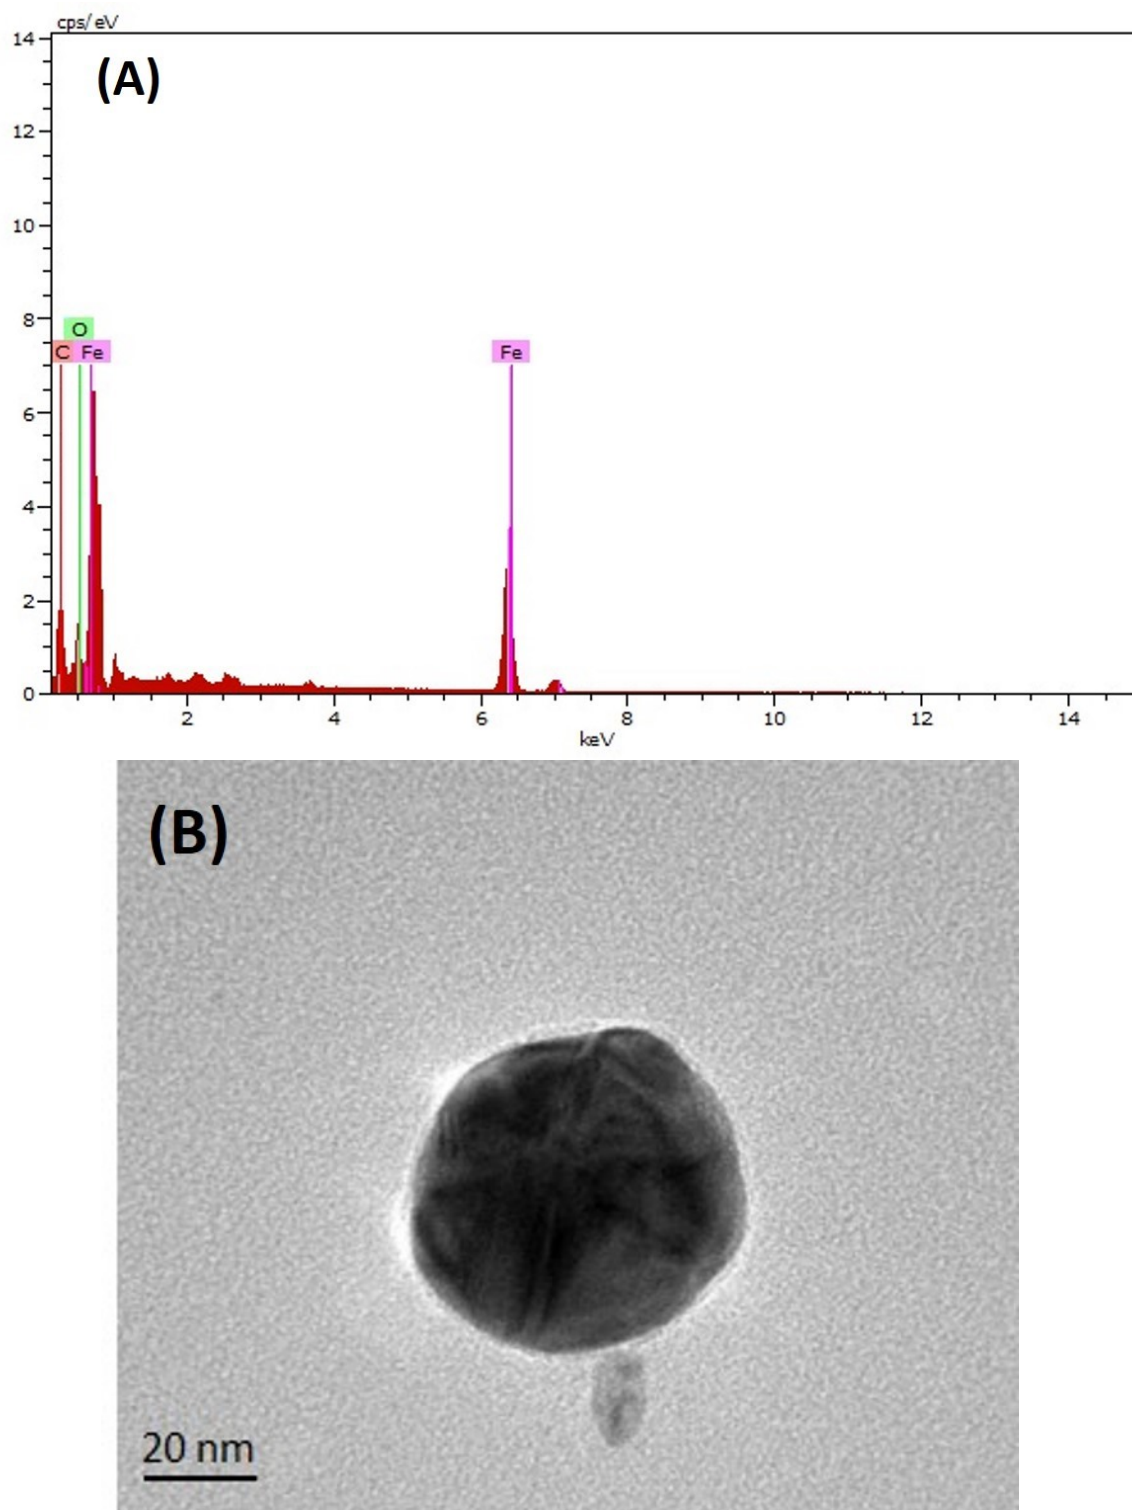

**Fig. S1** EDX spectra of C-Fe<sub>3</sub>O<sub>4</sub> NPs (a) and HR-TEM image of C-Fe<sub>3</sub>O<sub>4</sub> NPs@OVA

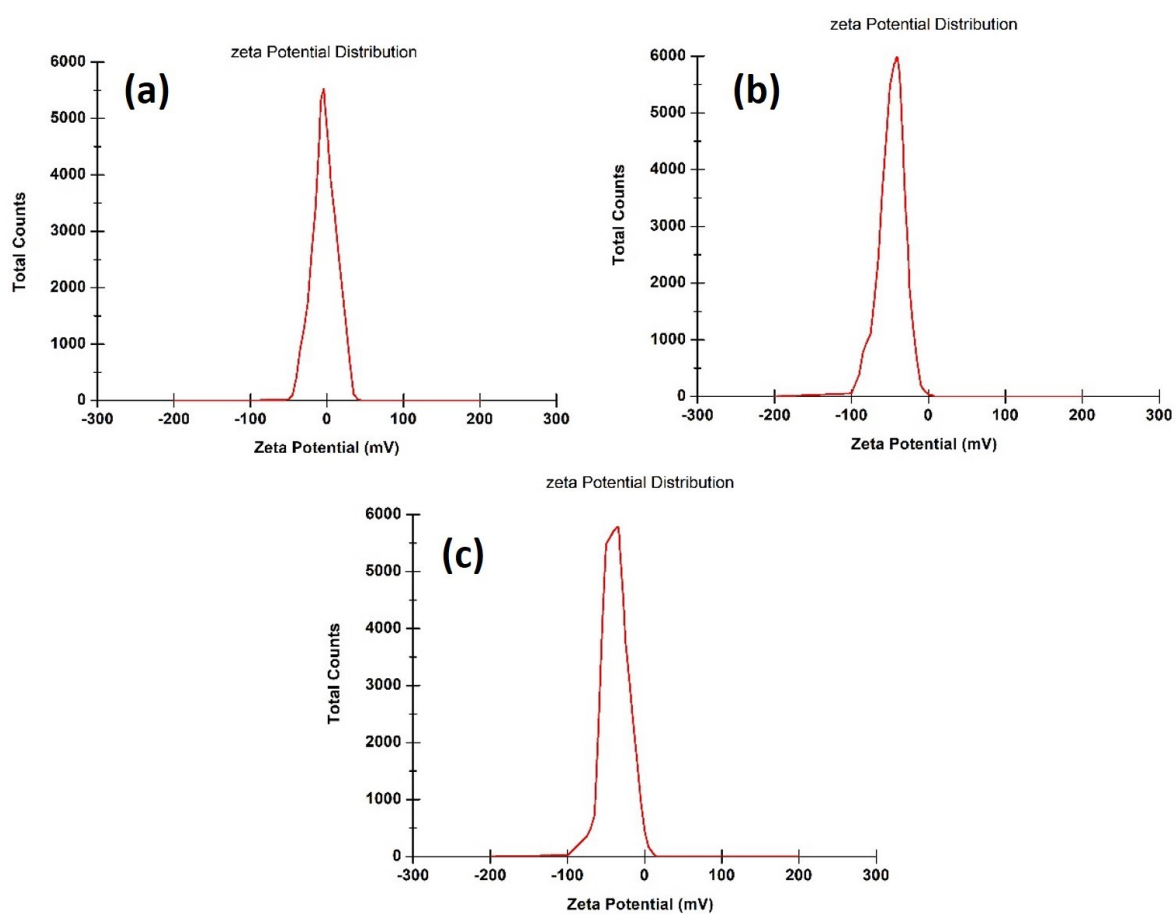

**Fig. S2.** The Zeta potential distribution of  $\text{Fe}_3\text{O}_4$  NPs (a), C- $\text{Fe}_3\text{O}_4$  NPs (b) and C- $\text{Fe}_3\text{O}_4$  NPs@OVA (c)

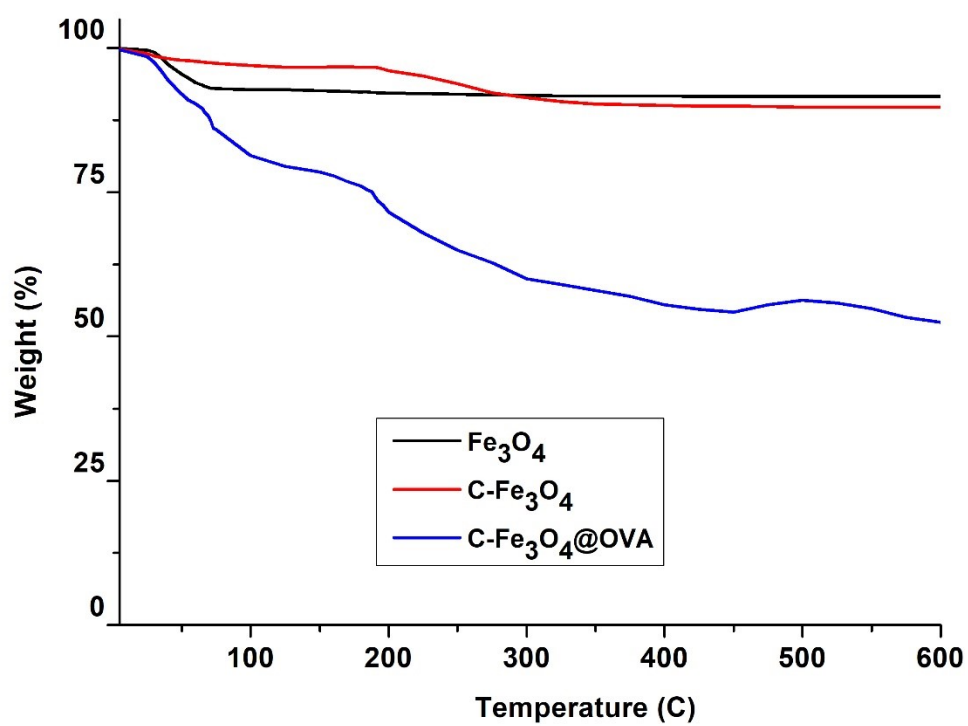

**Fig. S3.** Thermogram of Fe<sub>3</sub>O<sub>4</sub> NPs (a), C-Fe<sub>3</sub>O<sub>4</sub> NPs (b) and C-Fe<sub>3</sub>O<sub>4</sub> NPs@OVA (c).

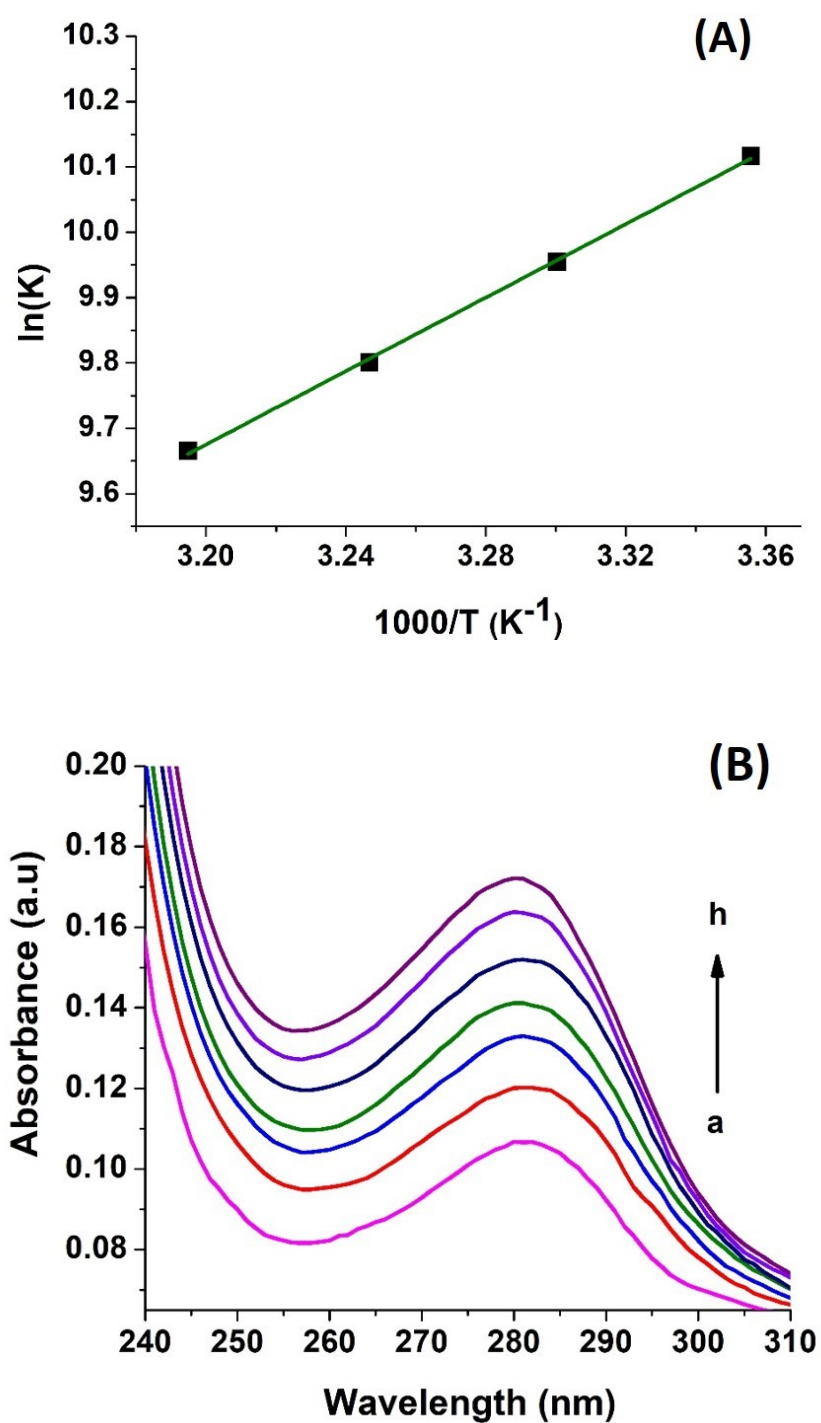

**Fig. S4.** Van't Hoff plot for the OVA-5-CQA system (A), UV-Vis absorption spectra of OVA ( $5.00 \times 10^{-6}$  mol  $dm^{-3}$ ) in the presence of various concentrations of C- $Fe_3O_4$  NPs at 298 K (B), [OVA]: =  $5.00 \times 10^{-6}$  mol  $dm^{-3}$ ; [C- $Fe_3O_4$  NPs]: [a-i]: 0.00, 0.40, 0.80, 1.20, 1.60, 2.00, 3.00, 4.00 and  $5.00 \times 10^{-6}$  mol  $dm^{-3}$ .

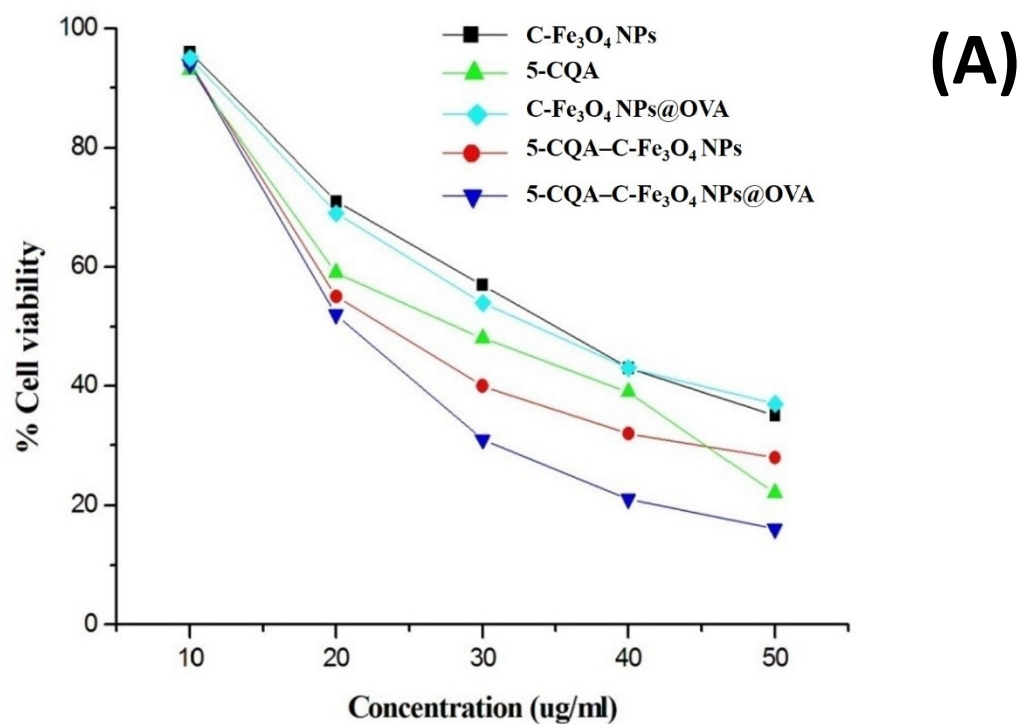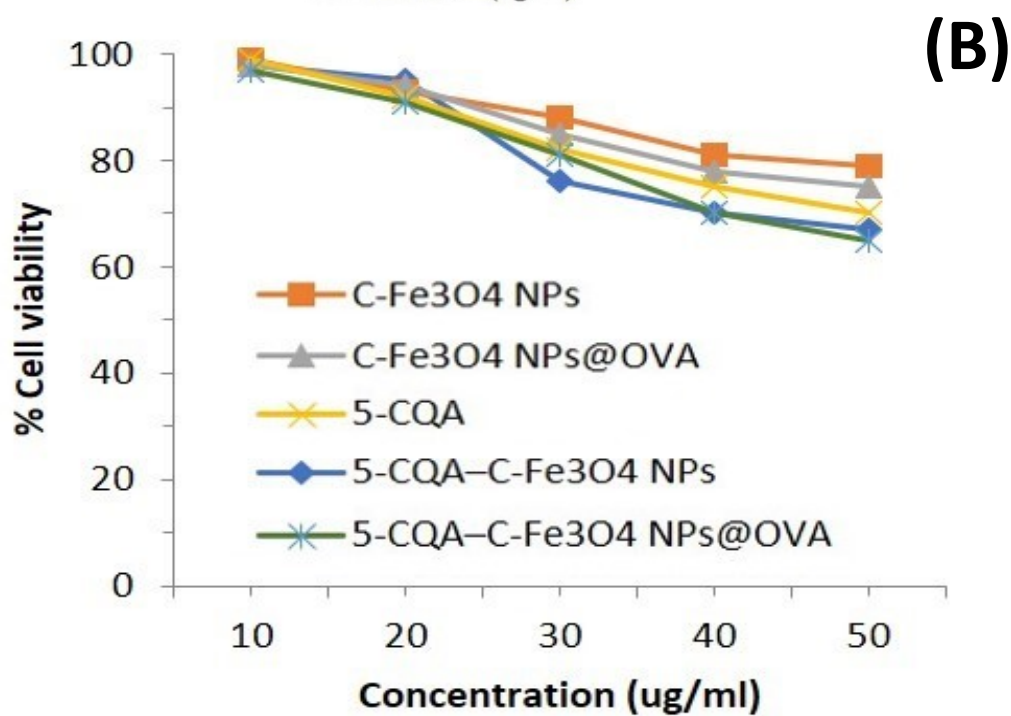

**Fig. S5.** (A) Cytotoxic effect of C-Fe<sub>3</sub>O<sub>4</sub> NPs, 5-CQA, C-Fe<sub>3</sub>O<sub>4</sub> NPs@OVA, 5-CQA encapsulated C-Fe<sub>3</sub>O<sub>4</sub> NPs and 5-CQA encapsulated C-Fe<sub>3</sub>O<sub>4</sub> NPs@OVA on the viability of MDA-MB-231 cells and (B) normal epithelial (HBL 100) cells

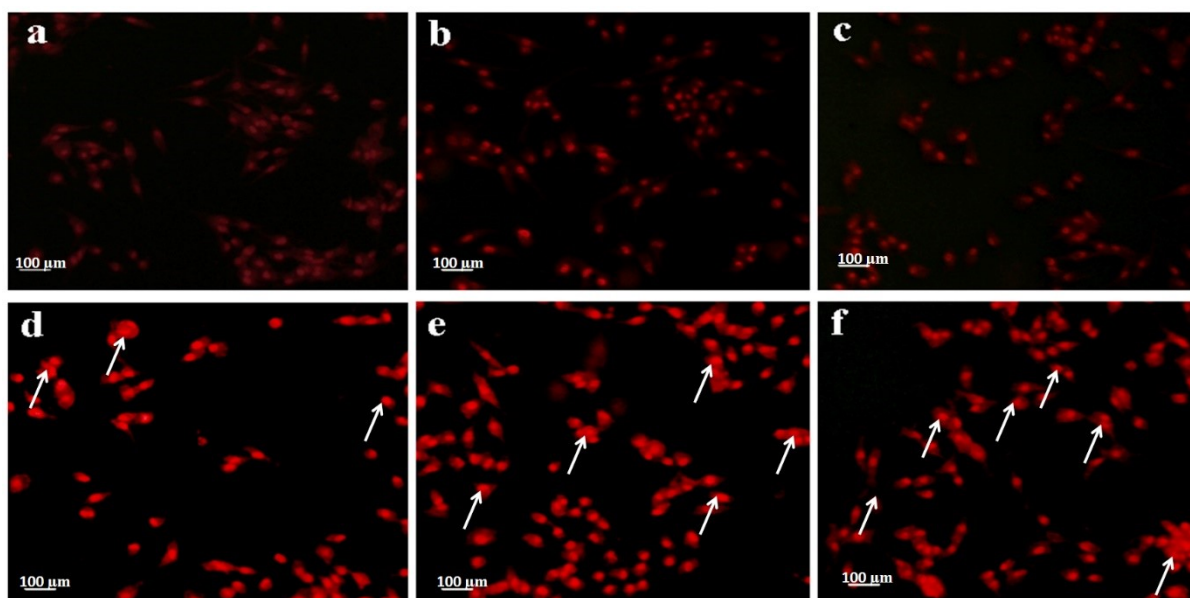

**Fig. S6.** PI apoptotic analysis of untreated and treated cells. Control (untreated cells) (a), C-Fe<sub>3</sub>O<sub>4</sub> NPs (b), 5-CQA (c), C-Fe<sub>3</sub>O<sub>4</sub> NPs@OVA (d), 5-CQA-C-Fe<sub>3</sub>O<sub>4</sub> NPs (e), 5-CQA-C-Fe<sub>3</sub>O<sub>4</sub> NPs@OVA (f) system treated MDA-MB-231 cells at 24 h. The scale bar represents 100 μm. White arrows in Fig. S6 indicate the apoptotic cells.
